# Supplementary material for: The X chromosome in immune functions: when a chromosome makes the difference
Source: Springer Nature journal article supplement (doi:10.1038/nri2815), 2010-07-23
Supplement: 41577_2010_BFnri2815_MOESM1_ESM.pdf [file 41577_2010_BFnri2815_MOESM1_ESM.pdf]

Supplementary information S1 (Table) | **Genes located on the human X chromosome with a direct or indirect role in immune functions\***

| Gene Location                                         | Gene                 | Description                                             | Human map      | Function in immunity and/ or disease                                                   | Mouse map |
|-------------------------------------------------------|----------------------|---------------------------------------------------------|----------------|----------------------------------------------------------------------------------------|-----------|
| Pseudoautosomal region 1 (PAR1)                       | <i>CRFL2</i>         | Cytokine receptor-like factor 2                         | Xp22.3; Yp11.3 | Enhances DC maturation and T cell proliferation                                        | Chr. 5    |
|                                                       | <i>GMCSFR/CSF2RA</i> | Granulocyte/macrophage colony-stimulating factor        | Xp22.3; Yp11.3 | Granulocyte and monocyte differentiation                                               | Chr. 19   |
|                                                       | <i>IL3RA</i>         | Interleukin 3 receptor alpha                            | Xp22.3; Yp11.3 | Component of the IL-3 receptor                                                         | Chr. 14   |
|                                                       | <i>CD99/MIC2</i>     | CD99 antigen                                            | Xp22.3; Yp11.3 | T cell regulation                                                                      | Chr. 4    |
| Nonrecombining region of the X chromosome (short arm) | <i>ARHGAP6</i>       | Rho GTPase activating protein 6                         | Xp22.2         | Regulation of the small GTP-binding proteins of the RAS superfamily                    | X (F5)    |
|                                                       | <i>TLR7</i>          | Toll-like receptor 7                                    | Xp22.2         | Viral recognition; SLE                                                                 | X (F5)    |
|                                                       | <i>TLR8</i>          | Toll-like receptor 8                                    | Xp22.2         | Viral recognition; susceptibility to tuberculosis                                      | X (F5)    |
|                                                       | <i>PIGA</i>          | Phosphatidylinositol glycan anchor biosynthesis class A | Xp22.2         | PNH; regulation of GPI-anchored complement regulatory proteins                         | X (F3-F4) |
|                                                       | <i>BMX</i>           | Bone marrow kinase X-linked                             | Xp22.2         | Growth and differentiation of haematopoietic cells                                     | X (F)     |
|                                                       | <i>RPS6KA3/RSK2</i>  | Ribosomal protein S6 kinase alpha-3                     | Xp22.1         | Control of TLR signalling; required for endocytosis in DCs                             | X (F4)    |
|                                                       | <i>CNKSR2</i>        | Connector enhancer of kinase suppressor of ras 2        | Xp22.1         | Regulator of RAS signalling                                                            | X (F4)    |
|                                                       | <i>IL1RAPL1</i>      | IL1 receptor associated protein-like 1                  | Xp21.3         | Orphan receptor of the IL-1R superfamily                                               | X (C1)    |
|                                                       | <i>CYBB/NOX2</i>     | Cytochrome b-245 beta polypeptide                       | Xp11.4         | X-CGD; ROS production                                                                  | X (A1.1)  |
|                                                       | <i>DUSP21</i>        | Dual specificity phosphatase 21                         | Xp11.3         | Phosphatase activity                                                                   | X (A1.2)  |
|                                                       | <i>TIMP1</i>         | Tissue inhibitor of metalloproteinase 1                 | Xp11.23        | RA; CD; inhibitor of metalloproteinases; erythroid-potentiating activity; wound repair | X (A1.3)  |
|                                                       | <i>PFC/CFP</i>       | Properdin P factor complement                           | Xp11.23        | Properdin deficiency; positive regulator of the alternative complement pathway         | X (A3)    |
|                                                       | <i>WAS</i>           | Wiskott-Aldrich syndrome protein                        | Xp11.23        | WAS; cytoskeleton organization                                                         | X (A1.1)  |
|                                                       | <i>GATA1</i>         | GATA binding protein 1                                  | Xp11.23        | Differentiation of erythrocytes and megakaryocytes                                     | X (A2)    |
|                                                       | <i>FOXP3</i>         | Forkhead box P3                                         | Xp11.23        | IPEX syndrome; differentiation of regulatory T cells                                   | X (A1.1)  |
| Nonrecombining region of the X chromosome (long arm)  | <i>ARHGEF9</i>       | CDC42 guanine nucleotide exchange factor (GEF) 9        | Xq11.2         | Activation of CDC42                                                                    | X (C3)    |
|                                                       | <i>VSIG4</i>         | V-set and immunoglobulin domain containing 4            | Xq12           | Macrophage mediated phagocytosis; inhibition of T cell activation                      | X (C3)    |
|                                                       | <i>EDA2R/XEDAR</i>   | Ectodysplasin A2 receptor                               | Xq12           | Activation of NF-κB and JNK pathways                                                   | X (C3)    |
|                                                       | <i>EDA</i>           | Ectodysplasin A                                         | Xq13.1         | XHED; regulation of NF-κB and JNK pathways                                             | X (C3)    |
|                                                       | <i>IGBP1</i>         | Immunoglobulin (CD79A) binding protein 1                | Xq13.1         | Inhibitor of apoptosis                                                                 | X (C3)    |
|                                                       | <i>IL2RG</i>         | Interleukin 2 receptor gamma                            | Xq13.1         | X-SCID; receptor for interleukins 2, 4, 7, 9, 15 and 21                                | X (D)     |
|                                                       | <i>CXCR3</i>         | Chemokine (C-X-C motif) receptor 3                      | Xq13.1         | Receptor for CXCL9, 10 and 11                                                          | X (D)     |
|                                                       | <i>FGF16</i>         | Fibroblast growth factor 16                             | Xq21.1         | Cell growth, morphogenesis, tissue repair, inflammation                                | X (C3)    |
|                                                       | <i>NOX1</i>          | NADPH oxidase 1                                         | Xq22.1         | ROS production                                                                         | X (E3)    |
|                                                       | <i>BTK</i>           | Bruton agammaglobulinaemia tyrosine kinase              | Xq22.1         | XLA; TLR4 and TLR2 signalling pathways                                                 | X (E3)    |

## SUPPLEMENTARY INFORMATION

|                                                      |                                 |                                                      |                            |                                                                                                          |           |
|------------------------------------------------------|---------------------------------|------------------------------------------------------|----------------------------|----------------------------------------------------------------------------------------------------------|-----------|
| Nonrecombining region of the X chromosome (long arm) | <i>IL1RAPL2</i>                 | IL1 receptor-associated protein-like 2               | Xq22.3                     | Orphan receptor of the IL1R superfamily                                                                  | X (F1)    |
|                                                      | <i>TSC22D3/GILZ</i>             | TSC22 domain family member 3                         | Xq22.3                     | Anti-inflammatory and immunosuppressive functions                                                        | X (F1)    |
|                                                      | <i>IL13RA2</i>                  | Interleukin 13 receptor alpha 2                      | Xq23                       | IL-13 signalling (decoy receptor)                                                                        | X (F2)    |
|                                                      | <i>IL13RA1</i>                  | Interleukin 13 receptor alpha 1                      | Xq24                       | IL-13 signalling                                                                                         | X (A3.3)  |
|                                                      | <i>NKRF</i>                     | NF-kappaB repressing factor                          | Xq24                       | Silencing of IFNB through NF-kB inhibition                                                               | X (A3.3)  |
|                                                      | <i>NKAP</i>                     | NF-kappaB activating protein                         | Xq24                       | Regulation of NF-kB activation; T cell development                                                       | X (A3.3)  |
|                                                      | <i>XIAP/BIRC4</i>               | Inhibitor of apoptosis X-linked                      | Xq25                       | XLP2; direct inhibition of caspases 3 and 7                                                              | X (A3-A5) |
|                                                      | <i>SH2D1A/SAP</i>               | SLAM-associated protein                              | Xq25                       | XLP1/EBV infection                                                                                       | X (A5)    |
|                                                      | <i>AIFM1</i>                    | Apoptosis-inducing factor                            | Xq26.1                     | Inducer of apoptosis                                                                                     | X (A6)    |
|                                                      | <i>CD40L</i>                    | CD40 ligand                                          | Xq26.3                     | XHIM syndrome; SLE; Malaria; HIV                                                                         | X (A5)    |
|                                                      | <i>ARHGEF6</i>                  | RAC/CDC42 guanine nucleotide exchange factor (GEF) 6 | Xq26.3                     | Activation of the RAS-like family of Rho proteins; cytoskeleton organization; apoptosis                  | X (A5)    |
|                                                      | <i>BGN</i>                      | Biglycan precursor                                   | Xq28                       | Endogenous ligand for TLR2 and TLR4 in macrophages; activation of p38, ERK and NF-kB                     | X (B)     |
|                                                      | <i>DUSP9/MKP4</i>               | Dual specificity phosphatase 9                       | Xq28                       | Inactivation of MAP kinases                                                                              | X (B)     |
|                                                      | <i>ARHGAP4</i>                  | Rho GTPase activating protein 4                      | Xq28                       | Regulation of the small GTP-binding proteins of the RAS superfamily                                      | X (A7.3)  |
|                                                      | <i>IRAK1</i>                    | Interleukin-1 receptor-associated kinase 1           | Xq28                       | TLR signalling                                                                                           | X (A7.3)  |
|                                                      | <i>G6PD</i>                     | Glucose-6-phosphate dehydrogenase                    | Xq28                       | G6PD-deficiency; required for oxidative burst by phagocytes and erythrocytes                             | X (A7)    |
|                                                      | <i>IKBKG/NEMO</i>               | Inhibitor of kappaB kinase gamma                     | Xq28                       | Incontinentia pigmenti; EDA-ID; regulation of NF-kB signalling; susceptibility to mycobacterial diseases | X (A7.3)  |
| <i>GAB3</i>                                          | GRB2-associated binding protein | Xq28                                                 | Macrophage differentiation | X (A7.3)                                                                                                 |           |
| <i>MTCP1</i>                                         | Mature T cell proliferation 1   | Xq28                                                 | T cell proliferation       | X (A7.3)                                                                                                 |           |
| Pseudoautosomal region 2 (PAR2)                      | <i>IL9R</i>                     | Interleukin-9 receptor                               | Xq28                       | IL-9 receptor on several haematopoietic cells; RA                                                        | Chr. 11   |

CD: Crohn's disease; CXCL: chemokine CXC motif; DC: dendritic cells; EBV: Epstein-Barr virus; EDA-ID: anhidrotic ectodermal dysplasia with immunodeficiency; ERK: extracellular signal-regulated kinases; GPI: glycosylphosphatidylinositol (anchor); GRB: growth factor receptor-bound protein; GTP: guanosine triphosphate; HIV: human immunodeficiency virus; IFN: interferon; IL: interleukin; IPEX: immune dysregulation-polyendocrinopathy-enteropathy, X-linked; JNK: c-Jun N-terminal kinases; MAP: mitogen-activated protein; NADPH: reduced form of nicotinamide adenine dinucleotide phosphate; NF-kB: nuclear factor kappa-B; p38: p38 MAP kinase; PNH: paroxysmal nocturnal hemoglobinuria; RA: rheumatoid arthritis; RAC: RAS-related C3 botulinum toxin substrate; RAS: rat sarcoma; ROS: reactive oxygen species; SLAM: signaling lymphocyte activation molecule; SLE: systemic lupus erythematosus; TLR: toll-like receptor; TSC22: transforming growth factor-beta-stimulated clone-22; WAS: Wiskott-Aldrich syndrome; X-CGD: chronic granulomatous disease, X-linked; XHED: X-linked hypohidrotic ectodermal dysplasia; XHIM: X-linked hyper-IgM syndrome; XLA: Bruton (X-linked) agammaglobulinemia; XLP: X-linked lymphoproliferative disease; X-SCID: severe combined immunodeficiency, X-linked. \* The table depicts the genes located in the pseudoautosomal and nonrecombining regions of the human X chromosomes with direct or indirect immune functions. The depicted genes located in the nonrecombining region of the X chromosome do not have any known Y homologues. Mapping positions (chromosome number; cytogenetic band in brackets) of the mouse genome are shown for comparison. Human and mouse mapping positions are based on the Ensembl database.
